# Supplementary material for: Speeded-Up Focus Control of Electrically Tunable Lens by Sparse Optimization
Source: PubMed Central journal article supplement (PMC6710262; doi:10.1038/s41598-019-48900-z), 2019-08-26
Supplement: 41598_2019_48900_MOESM1_ESM.pdf [file 41598_2019_48900_MOESM1_ESM.pdf]

# Speeded-Up Focus Control of Electrically Tunable Lens by Sparse Optimization

Daisuke Iwai<sup>1,\*,+</sup>, Hidetoshi Izawa<sup>1,+</sup>, Kenji Kashima<sup>2,+</sup>, Tatsuyuki Ueda<sup>1</sup>, and Kosuke Sato<sup>1</sup>

<sup>1</sup>Osaka University, Graduate School of Engineering Science, Toyonaka, 560-8531, Japan

<sup>2</sup>Kyoto University, Graduate School of Informatics, Kyoto, 606-8501, Japan

\*daisuke.iwai@sys.es.osaka-u.ac.jp

+these authors contributed equally to this work

## Supplementary Material

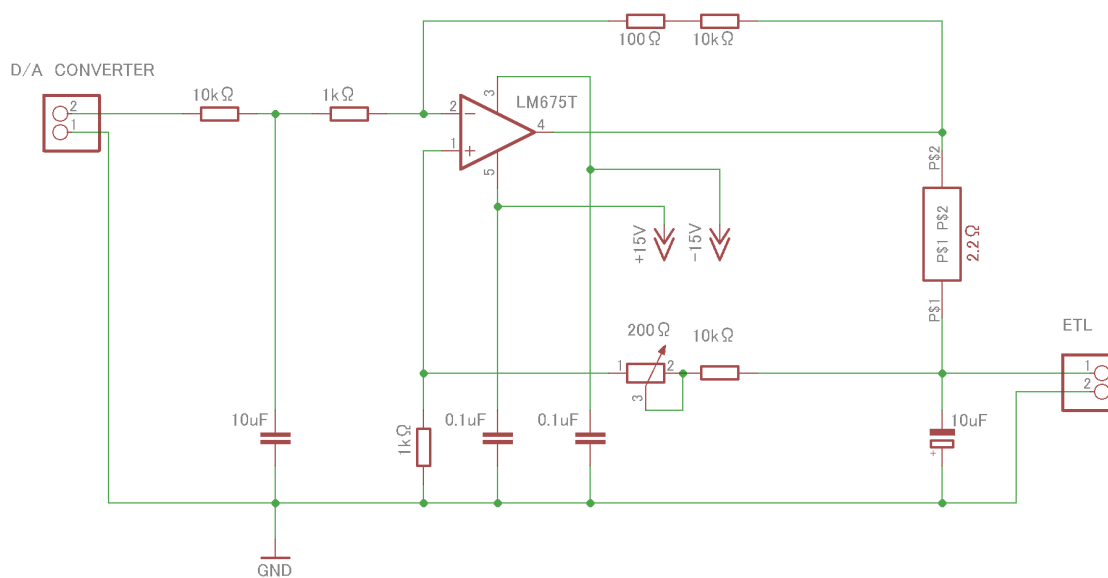

**Figure 1.** The diagram of the custom amplifier circuit.
